# Supplementary material for: Field Trial of an Automated Batch Chlorinator System at Two Shared Shallow Tubewells among Camps for Forcibly Displaced Myanmar Nationals (FDMN) in Cox’s Bazar, Bangladesh
Source: MDPI journal article supplement (doi:10.3390/ijerph182412917), 2021-12-08
Supplement: s1 [file s1]

# Field Trial of an Automated Batch Chlorinator System at Two Shared Shallow Tubewells among Camps for Forcibly Displaced Myanmar Nationals (FDMN) in Cox's Bazar, Bangladesh

Nuhu Amin <sup>1,2,\*</sup>, Mahbubur Rahman <sup>1</sup>, Mahbub-Ul Alam <sup>1</sup>, Abul Kasham Shoab <sup>1</sup>, Md. Kawsar Alome <sup>3</sup>, Maksudul Amin <sup>3</sup>, Tarique Md. Nurul Huda <sup>1</sup> and Leanne Unicomb <sup>1</sup>

## Supplementary Materials

**Table S1.** Free residual chlorine concentration level with different iron concentrations in 4 tubewells, Cox's Bazar-2017.

| Sampling Dates | Tubewell ID                           | Concentration of iron (mg/L) | ~5.25% NaOCl: Water (mL) | Concentration of chlorine used for treatment | Concentration of Free Chlorine (mg/L) |
|----------------|---------------------------------------|------------------------------|--------------------------|----------------------------------------------|---------------------------------------|
| 8/28/2018      | 17*                                   | <0.2                         | 1500:750                 |                                              | 9.1                                   |
| 8/28/2018      | 17                                    | <0.2                         | 1500:750                 | 3.5%                                         | 8.6                                   |
| 8/28/2018      | 17                                    | <0.2                         | 1500:750                 |                                              | 9.3                                   |
| 8/28/2018      | 17                                    | <0.2                         | 1500:750                 |                                              | 10.3                                  |
|                | Mean free chlorine concentration (SD) |                              |                          |                                              | 9.3 (0.7)                             |
| 8/29/2018      | 13                                    | 6.5                          | 1500:750                 | 3.5%                                         | 3.5                                   |
| 8/29/2018      | 13                                    | 6.5                          | 1500:750                 |                                              | 0.02                                  |
| 8/31/2018      | 13                                    | 6.5                          | 1500:500                 | 3.9%                                         | 0.4                                   |
| 8/31/2018      | 13                                    | 6.5                          | 1500:500                 |                                              | 0.4                                   |
|                | Mean free chlorine concentration (SD) |                              |                          |                                              | 1.11 (1.6)                            |
| 8/29/2018      | 2**                                   | 7                            | 1000:500                 | 3.5%                                         | 0.04                                  |
|                | Mean free chlorine concentration (SD) |                              |                          |                                              | 0.04                                  |
| 8/31/2018      | 5                                     | 1.5                          | 1500:750                 |                                              | 4.2                                   |
| 8/31/2018      | 5                                     | 1.5                          | 1500:750                 | 3.5%                                         | 2.6                                   |
| 8/31/2018      | 5                                     | 1.5                          | 1500:750                 |                                              | 4.4                                   |
| 8/31/2018      | 5                                     | 1.5                          | 1500:750                 |                                              | 3.7                                   |
|                | Mean free chlorine concentration (SD) |                              |                          |                                              | 3.73 (0.83)                           |

\*At the beginning of the field trial, we had installed Zimba at deep tubewell ID-17, but we received complaints from the household users that the handle had become too tight to pump water. Hence, we removed the Zimba from tubewell ID-17. \*\*Tubewell 2 had a very high (7 mg/L) concentration of iron and it was not providing sufficient residual chlorine immediately after treatment. Additionally, the color of the water became red due to a chemical reaction between iron and residual chlorine immediately after mixing resulting in the removal of the Zimba from tubewell ID-2.

**Table S2.** A comparison table among WHO recommended drinking water quality, pre-treated water quality, and post-treated (zimba) water quality.

| Parameters                         | WHO     | Pre-treated source water | Pre-treated stored water in household own vessel | Post-treated (zimba) source water | Post-treated (zimba) stored water in household own vessel | Post-treated (zimba) household stored water in project provided safe storage containers |
|------------------------------------|---------|--------------------------|--------------------------------------------------|-----------------------------------|-----------------------------------------------------------|-----------------------------------------------------------------------------------------|
|                                    |         | Mean                     | Mean                                             | Mean                              | Mean                                                      | Mean                                                                                    |
| <sup>1</sup> Iron (mg/L)           | 0.3-3.0 | 4.0                      | 2.2                                              | 5.8                               | 1.9                                                       | 2.8                                                                                     |
| <sup>1</sup> TDS (ppm)             | <300    | 240.3                    | 238.0                                            | 215.3                             | 253.1                                                     | 235.4                                                                                   |
| <sup>1</sup> Free Chlorine (mg/L)  | 0.2-2   | NA*                      | 0.15                                             | 2.1                               | 0.39                                                      | 1.4                                                                                     |
| <sup>1</sup> Total Chlorine (mg/L) | 0.2-2   | NA                       | 0.17                                             | 2.21                              | 0.5                                                       | 1.72                                                                                    |
| <sup>2</sup> Turbidity (NTU)       | ≤5      | 2.55                     | 2.6                                              | 2.50                              | 1.8                                                       | 2.81                                                                                    |

NA\* = Not applicable for underground source water. <sup>1</sup>WHO (1996): Guidelines for drinking-water quality, 2nd ed. Vol. 2. Health criteria and other supporting information. World Health Organization, Geneva, 1996.

<sup>2</sup>WHO (2017): WATER QUALITY AND HEALTH - REVIEW OF TURBIDITY: Information for regulators and water suppliersWorld Health Organization, Geneva, 2017.

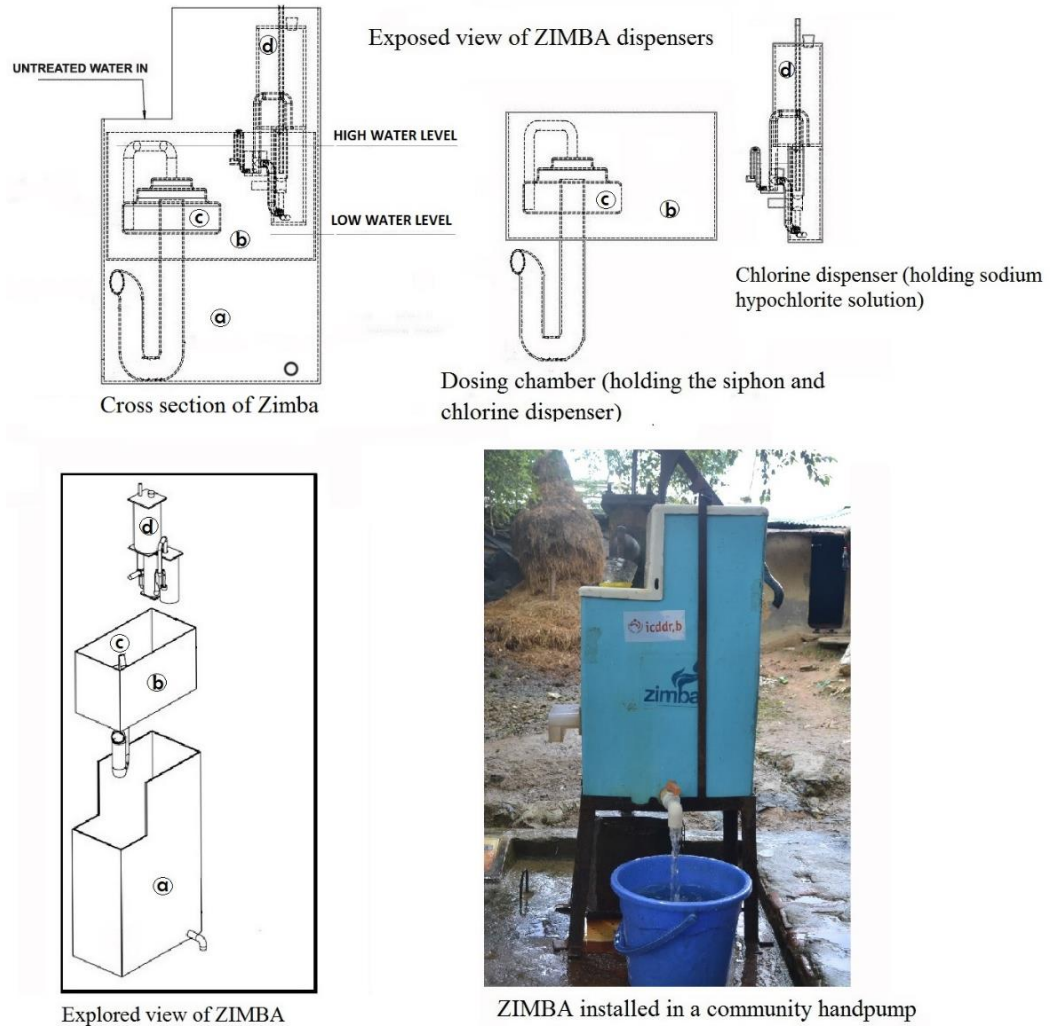

**Figure S1.** Zimba automated chlorine dispenser. Figure provided by inventor Suprio Das. Figure showing (a) Outer box: upper part of the outer box holds dosing chamber and lower part acts as a secondary tank which water flushes into after chlorination. (b) Dosing chamber: this chamber holds an automatic siphon and the chlorine dispenser. As untreated water from the handpump starts filling up this chamber, 3 mL of sodium hypochlorite solution is ejected from the chlorine dispenser into this water. When the water level reaches the high-water level (10 L) the automatic siphon is triggered and this 10 L of treated water is flushed into the secondary tank. (c) Siphon: Water from the dosing chamber flushes into the secondary tank through the siphon. (d) Chlorine dispenser: This consists of a chlorine reservoir and a combination of interconnected pipes and tubes. Dimensions of the Zimba are 76 cm x 45 cm x 25 cm; the outer casing, dosing chamber, and the siphon are made of fiberglass and the dispensers are made of acrylic.

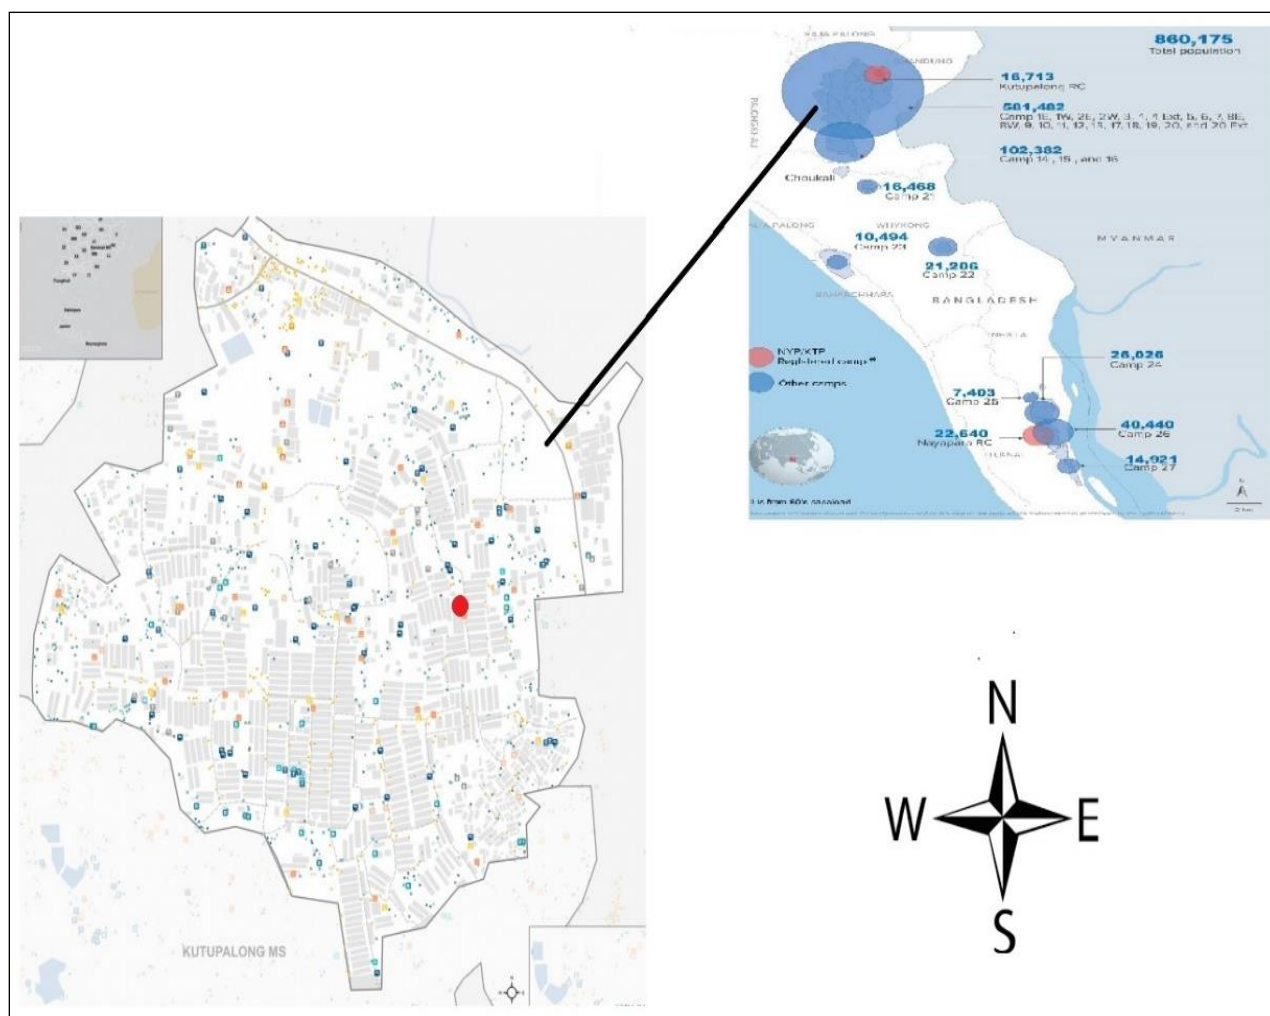

Figure S2. Study site map.

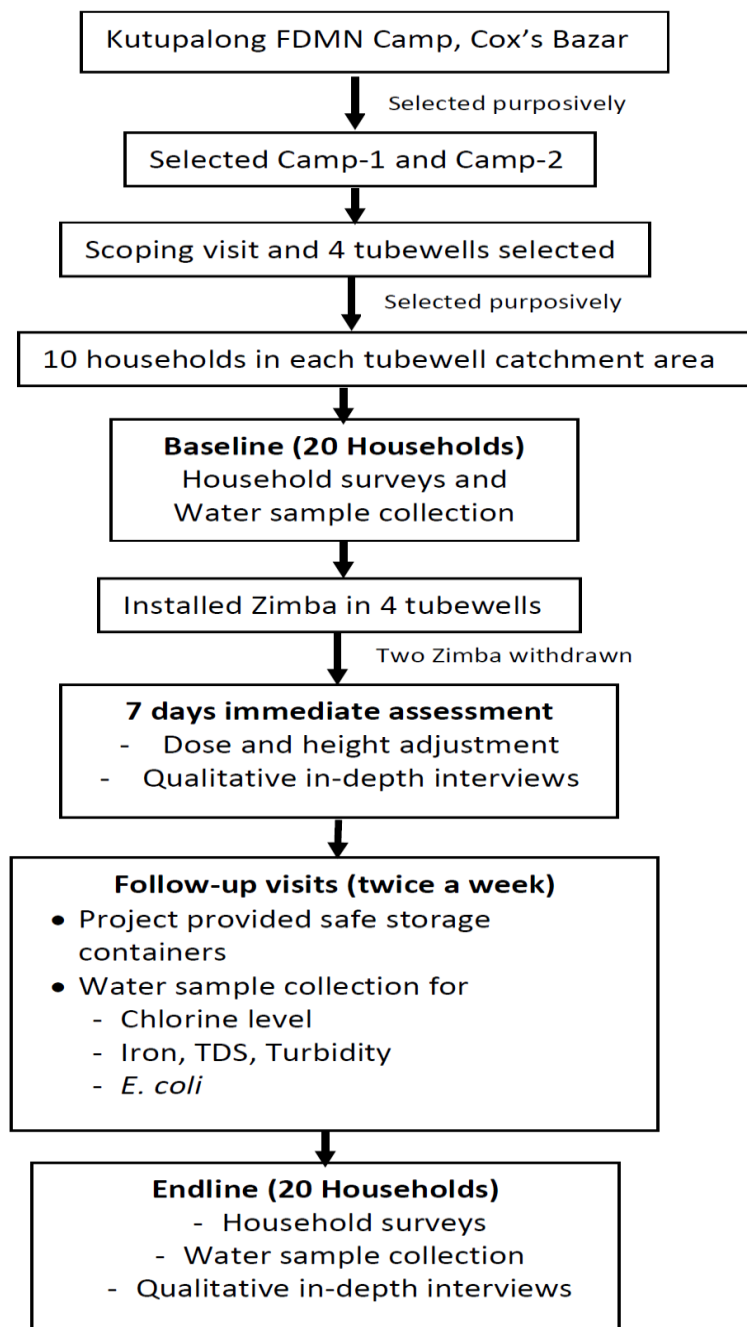

Figure S3. Study flow chart.

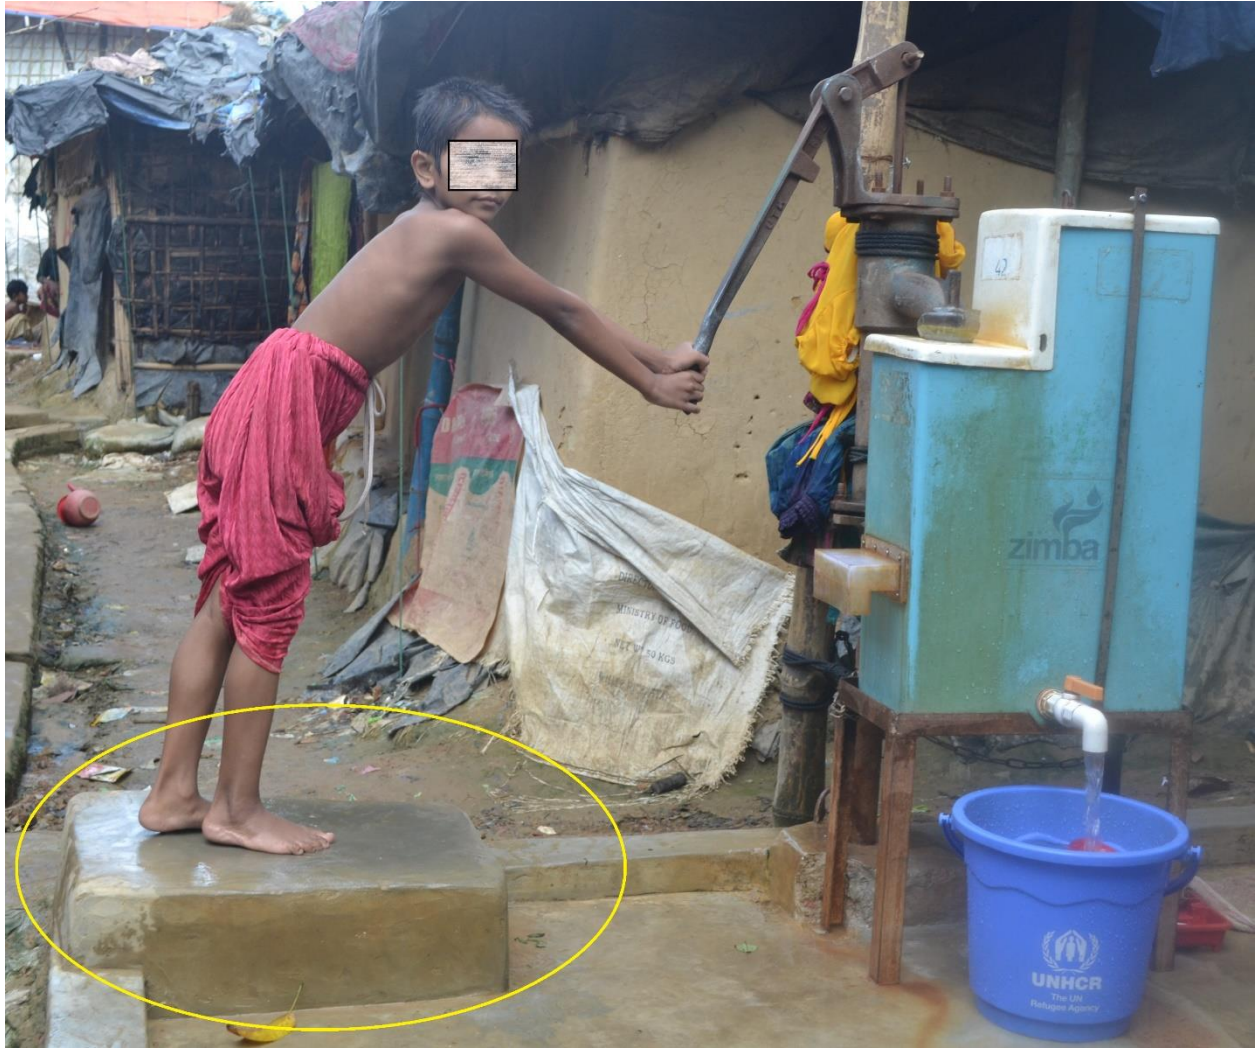

**Figure S3.** Raised footstep to resolve the increased height of tubewell after Zimba installation, Rohingya camp, Cox's Bazar-2017.
